# Supplementary material
Source: publisher figshare collection journal article supplement (https://acs.figshare.com/ndownloader/files/4030036)
Supplement: Supplementary file 1 [file 4030036]

## Sheet: Hg up
MIPS functional categories whose genes were significantly enriched (P < 0.05; FDR < 0.05)
Genes were up-regulated in a dose-dependent manner (fold change > 2) in response to Hg treatment.
Top-level categories are shown for all significantly enriched sub-categories. Top-level categories that are significantly enriched are shown in bold.
For each catergory, the number of genes present in the differentially expressed subset ("regulated") as well as in the whole transcriptome is shown. Additionally, percentages of genes in categories are given for regulated genes and transcriptome (i.e. number of genes in category compared to total number of genes in regulated subset or whole transcriptome)
	Number of genes		Relative set of genes (%)
FUNCTIONAL CATEGORY	regulated	transcriptome	regulated	transcriptome	P-value	Bonferoni	FDR
01 METABOLISM	12	5940	14.2	9.37	0.0923463	78.0327	0.00295858
01.02.03 sulfur metabolism	1	26	1.19	0.04	0.0339105	28.6544	0.00147929
01.05.02 sugar, glucoside, polyol and carboxylate metabolism	4	505	4.76	0.79	0.0046558	3.93415	0.000473373
01.05.02.07 sugar, glucoside, polyol and carboxylate catabolism	4	337	4.76	0.53	0.00108526	0.917041	0.000236686
01.20 secondary metabolism	5	1032	5.95	1.62	0.0121772	10.2897	0.000710059
01.20.01 metabolism of primary metabolic sugar derivatives	2	89	2.38	0.14	0.0063108	5.33263	0.000532544
01.20.01.07 metabolism of glycosides	2	18	2.38	0.02	0.00026207	0.221449	5.91716e-05
02 ENERGY	4	1856	4.76	2.92	0.232217	196.223	0.00455621
02.10 tricarboxylic-acid pathway (citrate cycle, Krebs cycle, TCA cycle)	2	230	2.38	0.36	0.0376472	31.8119	0.00159763
10 CELL CYCLE AND DNA PROCESSING	6	1709	7.14	2.69	0.0261661	22.1104	0.00130178
10.03 cell cycle	5	1094	5.95	1.72	0.0153142	12.9405	0.000828402
10.03.02 meiosis	2	232	2.38	0.36	0.0382416	32.3142	0.00171598
10.03.05 cell cycle dependent cytoskeleton reorganization	2	47	2.38	0.07	0.00180598	1.52605	0.000295858
10.03.05.01 spindle pole body/centrosome and microtubule cycle	1	29	1.19	0.04	0.0377494	31.8983	0.0016568
10.03.05.03 cell cycle dependent actin filament reorganization	1	19	1.19	0.02	0.0248942	21.0356	0.0012426
14 PROTEIN FATE (folding, modification, destination)	5	3721	5.95	5.87	0.552824	467.137	0.00579882
14.01 protein folding and stabilization	5	710	5.95	1.12	0.00259659	2.19412	0.00035503
14.10 assembly of protein complexes	3	596	3.57	0.94	0.0450901	38.1011	0.00189349
16 PROTEIN WITH BINDING FUNCTION OR COFACTOR REQUIREMENT	14	6750	16.6	10.6	0.0601066	50.7901	0.00218935
16.02 peptide binding	2	32	2.38	0.05	0.000839405	0.709297	0.000177515
16.06 motor protein binding	1	14	1.19	0.02	0.0184031	15.5506	0.000946746
16.17.01 calcium binding	2	245	2.38	0.38	0.0421923	35.6525	0.00183432
16.21.08 Fe/S binding	2	123	2.38	0.19	0.0117452	9.92468	0.000650888
18 REGULATION OF METABOLISM AND PROTEIN FUNCTION	4	1123	4.76	1.77	0.0624388	52.7608	0.00230769
18.02.01.02 enzyme inhibitor	2	165	2.38	0.26	0.020436	17.2684	0.00100592
30 CELLULAR COMMUNICATION/SIGNAL TRANSDUCTION MECHANISM	7	2654	8.33	4.18	0.0624545	52.7741	0.00236686
30.01 cellular signalling	7	2514	8.33	3.96	0.0494035	41.7459	0.00195266
30.01.09 second messenger mediated signal transduction	2	217	2.38	0.34	0.0338727	28.6224	0.00142012
32 CELL RESCUE, DEFENSE AND VIRULENCE	7	2778	8.33	4.38	0.0756401	63.9159	0.00266272
32.01 stress response	6	1884	7.14	2.97	0.039255	33.1705	0.00177515
32.01.05 heat shock response	4	244	4.76	0.38	0.000325133	0.274738	0.000118343
34 INTERACTION WITH THE ENVIRONMENT	6	1083	7.14	1.7	0.0032274	2.72715	0.000414201
34.03 membrane excitability	1	27	1.19	0.04	0.0351918	29.7371	0.00153846
34.03.01 synaptic transmission	1	18	1.19	0.02	0.0235994	19.9415	0.00118343
34.03.03 regulation, generation and propagation of action potential	1	14	1.19	0.02	0.0184031	15.5506	0.000887574
34.05.02 motor activity	1	7	1.19	0.01	0.00924376	7.81098	0.000591716
34.11 cellular sensing and response to external stimulus	3	437	3.57	0.68	0.0205745	17.3855	0.00106509
34.11.09 temperature perception and response	2	134	2.38	0.21	0.0138191	11.6771	0.000769231
42 BIOGENESIS OF CELLULAR COMPONENTS	8	2763	9.52	4.36	0.0301542	25.4803	0.00136095
42.05 centrosome	1	18	1.19	0.02	0.0235994	19.9415	0.00112426

## Sheet: Hg down
MIPS functional categories whose genes were significantly enriched (P < 0.05; FDR < 0.05)
Genes were down-regulated in a dose-dependent manner (fold change > 2) in response to Hg treatment.
Top-level categories are shown for all significantly enriched sub-categories. Top-level categories that are significantly enriched are shown in bold.
For each catergory, the number of genes present in the differentially expressed subset ("regulated") as well as in the whole transcriptome is shown. Additionally, percentages of genes in categories are given for regulated genes and transcriptome (i.e. number of genes in category compared to total number of genes in regulated subset or whole transcriptome)
	Number of genes		Relative set of genes (%)
FUNCTIONAL CATEGORY	regulated	transcriptome	regulated	transcriptome	P-value	Bonferoni	FDR
01 METABOLISM	12	5940	14.1	9.37	0.0988238	83.5061	0.00153846
01.01.03 assimilation of ammonia, metabolism of the glutamate group	4	220	4.7	0.34	0.000229739	0.19413	0.000473373
01.02 nitrogen, sulfur and selenium metabolism	4	415	4.7	0.65	0.00241847	2.04361	0.000769231
01.05.05 C-1 compound metabolism	2	119	2.35	0.18	0.0112802	9.5318	0.00112426
01.05.05.04 C-1 compound anabolism	2	41	2.35	0.06	0.00140963	1.19113	0.000591716
01.05.05.07 C-1 compound catabolism	2	54	2.35	0.08	0.00243231	2.0553	0.000828402
01.05.07 C-3 compound metabolism	3	28	3.52	0.04	7.44967e-06	0.00629497	0.000118343
20 CELLULAR TRANSPORT, TRANSPORT FACILITIES AND TRANSPORT ROUTES	13	3914	15.2	6.17	0.00210655	1.78004	0.000650888
20.01 transported compounds (substrates)	12	2486	14.1	3.92	0.000119738	0.101179	0.000414201
20.01.01 ion transport	6	689	7.05	1.08	0.000341743	0.288773	0.000532544
20.01.01.01 cation transport (H+, Na+, K+, Ca2+ , NH4+, etc.)	4	505	4.7	0.79	0.00485547	4.10287	0.00100592
20.01.01.01.01 heavy metal ion transport (Cu+, Fe3+, etc.)	4	109	4.7	0.17	1.50689e-05	0.0127332	0.000236686
20.01.01.07 anion transport	2	192	2.35	0.3	0.0276659	23.3777	0.00118343
20.01.03 C-compound and carbohydrate transport	3	263	3.52	0.41	0.00543477	4.59238	0.00106509
20.01.15 electron transport	5	683	5.88	1.07	0.00231484	1.95604	0.000710059
20.03 transport facilities	13	1712	15.2	2.7	4.74311e-07	0.000400793	5.91716e-05
20.09.18.07 non-vesicular cellular import	2	11	2.35	0.01	9.70532e-05	0.08201	0.00035503
32 CELL RESCUE, DEFENSE AND VIRULENCE	5	2778	5.88	4.38	0.316673	267.589	0.00242604
32.07 detoxification	3	528	3.52	0.83	0.0343869	29.0569	0.0012426
32.07.05 detoxification by export	1	30	1.17	0.04	0.0394813	33.3617	0.00130178
34 INTERACTION WITH THE ENVIRONMENT	6	1083	7.05	1.7	0.00342322	2.89262	0.000887574
34.01 homeostasis	6	516	7.05	0.81	7.1936e-05	0.0607859	0.000295858
34.01.01 homeostasis of cations	6	388	7.05	0.61	1.47579e-05	0.0124704	0.000177515
34.01.01.01 homeostasis of metal ions (Na, K, Ca etc.)	3	231	3.52	0.36	0.0037912	3.20357	0.000946746

## Sheet: Cd up
MIPS functional categories whose genes were significantly enriched (P < 0.05; FDR < 0.05)
Genes were up-regulated in a dose-dependent manner (fold change > 2) in response to Cd treatment.
Top-level categories are shown for all significantly enriched sub-categories.
For each catergory, the number of genes present in the differentially expressed subset ("regulated") as well as in the whole transcriptome is shown. Additionally, percentages of genes in categories are given for regulated genes and transcriptome (i.e. number of genes in category compared to total number of genes in regulated subset or whole transcriptome)
	Number of genes		Relative set of genes (%)
FUNCTIONAL CATEGORY	regulated	transcriptome	regulated	transcriptome	P-value	Bonferoni	FDR
02 ENERGY	2	1856	3.7	2.92	0.472057	398.888	0.00254438
02.19 metabolism of energy reserves (e.g. glycogen, trehalose)	2	206	3.7	0.32	0.0134715	11.3835	5.91716e-05
20 CELLULAR TRANSPORT, TRANSPORT FACILITIES AND TRANSPORT ROUTES	6	3914	11.1	6.17	0.114779	96.9882	0.00112426
20.01.01 ion transport	3	689	5.55	1.08	0.0210735	17.8071	0.000177515
20.03 transport facilities	5	1712	9.25	2.7	0.0151652	12.8146	0.000118343
20.03.22 transport ATPases	2	297	3.7	0.46	0.026701	22.5623	0.000236686
30 CELLULAR COMMUNICATION/SIGNAL TRANSDUCTION MECHANISM	2	2654	3.7	4.18	0.666741	563.396	0.00331361
30.01.09.11 polyphosphoinositol mediated signal transduction	1	47	1.85	0.07	0.0392949	33.2042	0.000295858
42 BIOGENESIS OF CELLULAR COMPONENTS	2	2763	3.7	4.36	0.688449	581.74	0.00337278
42.02 eukaryotic plasma membrane	1	53	1.85	0.08	0.0442009	37.3498	0.00035503

## Sheet: Cd down
MIPS functional categories whose genes were significantly enriched (P < 0.05; FDR < 0.05)
Genes were down-regulated in a dose-dependent manner (fold change > 2) in response to Cd treatment.
Top-level categories are shown for all significantly enriched sub-categories. Top-level categories that are significantly enriched are shown in bold.
For each catergory, the number of genes present in the differentially expressed subset ("regulated") as well as in the whole transcriptome is shown. Additionally, percentages of genes in categories are given for regulated genes and transcriptome (i.e. number of genes in category compared to total number of genes in regulated subset or whole transcriptome)
	Number of genes		Relative set of genes (%)
FUNCTIONAL CATEGORY	regulated	transcriptome	regulated	transcriptome	P-value	Bonferoni	FDR
14 PROTEIN FATE (folding, modification, destination)	8	3721	5.06	5.87	0.715628	604.706	0.00366864
14.13.01 cytoplasmic and nuclear protein degradation	5	720	3.16	1.13	0.0349774	29.5559	0.000887574
16 PROTEIN WITH BINDING FUNCTION OR COFACTOR REQUIREMENT	12	6750	7.59	10.6	0.921392	778.576	0.00426036
16.21.01 heme binding	2	107	1.26	0.16	0.0295415	24.9625	0.000828402
20 CELLULAR TRANSPORT, TRANSPORT FACILITIES AND TRANSPORT ROUTES	13	3914	8.22	6.17	0.179488	151.667	0.00195266
20.01.01.01.01 heavy metal ion transport (Cu+, Fe3+, etc.)	3	109	1.89	0.17	0.00263192	2.22397	0.000295858
20.01.09 peptide transport	2	72	1.26	0.11	0.0140889	11.9051	0.000532544
20.03 transport facilities	10	1712	6.32	2.7	0.0110875	9.36892	0.000473373
20.09.18 cellular import	5	338	3.16	0.53	0.00165935	1.40215	0.000177515
20.09.18.07 non-vesicular cellular import	3	11	1.89	0.01	2.47367e-06	0.00209025	5.91716e-05
30 CELLULAR COMMUNICATION/SIGNAL TRANSDUCTION MECHANISM	4	2654	2.53	4.18	0.90124	761.548	0.00414201
30.01.05.01 protein kinase	3	228	1.89	0.35	0.019724	16.6668	0.000591716
32 CELL RESCUE, DEFENSE AND VIRULENCE	8	2778	5.06	4.38	0.39017	329.694	0.00295858
32.07 detoxification	5	528	3.16	0.83	0.0107284	9.06548	0.000414201
32.07.03 detoxification by modification	2	92	1.26	0.14	0.0223392	18.8767	0.000769231
34 INTERACTION WITH THE ENVIRONMENT	6	1083	3.79	1.7	0.0549601	46.4413	0.00100592
34.01 homeostasis	6	516	3.79	0.81	0.00196392	1.65951	0.000236686
34.01.01 homeostasis of cations	6	388	3.79	0.61	0.000455753	0.385112	0.000118343
34.01.01.01 homeostasis of metal ions (Na, K, Ca etc.)	3	231	1.89	0.36	0.0204067	17.2436	0.000650888
42 BIOGENESIS OF CELLULAR COMPONENTS	5	2763	3.16	4.36	0.823195	695.6	0.00372781
42.04.03 actin cytoskeleton	3	145	1.89	0.22	0.00584514	4.93914	0.00035503
99 UNCLASSIFIED PROTEINS	128	46732	81	73.7	0.0209123	17.6709	0.000710059
